# Supplementary material
Source: PubMed Central journal article supplement (PMC4139498)

Type of file: figure

Label: Supplementary figure

Filename: supplementary\_figure.png

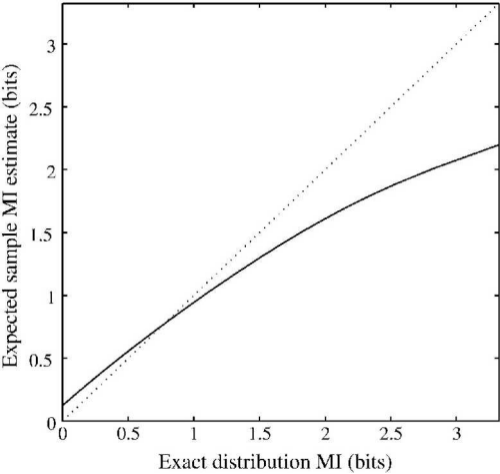

Supplement: NIHMS604450-supplement-supplement_1.pdf [file NIHMS604450-supplement-supplement_1.pdf]
